# Supplementary material
Source: Research Square preprint supplement (doi:10.21203/rs.3.rs-9862629/v1)
Supplement: Supplementary file 2 [file f4619e70152b332f8fb96ab8.xlsx]

## Sheet: Table S1
Supplementary Table 1. Characteristics of Participants in the Onset of Bipolar Disorders by Risk Cluster Analysis
Variable	Lower-Risk Cluster			Higher-Risk Cluster			Total
	Baseline to Year-2	Year-2 to Year-4	Year-4 to Year-6	Baseline to Year-2	Year-2 to Year-4	Year-4 to Year-6	Baseline to Year-2	Year-2 to Year-4	Year-4 to Year-6
N	7198	6175	3366	1198	964	517	8396	7139	3883
Mid-Interval Age in Years, Mean ± SD	11.02 ± 0.63	13.14 ± 0.68	15.21 ± 0.70	10.97 ± 0.63	13.08 ± 0.70	15.15 ± 0.74	11.02 ± 0.63	13.13 ± 0.68	15.20 ± 0.70
Sex Assigned at Birth
Female, n (%)	3,479 (48.3%)	2,953 (47.8%)	1,602 (47.6%)	479 (40.0%)	380 (39.4%)	202 (39.1%)	3,958 (47.1%)	3,333 (46.7%)	1,804 (46.5%)
Male, n (%)	3,719 (51.7%)	3,222 (52.2%)	1,764 (52.4%)	719 (60.0%)	584 (60.6%)	315 (60.9%)	4,438 (52.9%)	3,806 (53.3%)	2,079 (53.5%)
Interval Onsets
BD-I, n (%)	25 (0.3%)	71 (1.1%)	41 (1.2%)	23 (1.9%)	12 (2.2%)	16 (3.0%)	48 (0.6%)	93 (1.3%)	57 (1.4%)
BD-II, n (%)	8 (0.1%)	32 (0.5%)	19 (0.6%)	13 (1.1%)	4 (0.4%)	2 (0.4%)	21 (0.3%)	36 (0.5%)	21 (0.5%)
BD NOS, n (%)	30 (0.4%)	66 (1.1%)	40 (1.2%)	24 (2.0%)	24 (2.4%)	20 (3.7%)	54 (0.6%)	90 (1.3%)	60 (1.5%)
Any BSD, n (%)	50 (0.7%)	167 (2.7%)	93 (2.8%)	45 (3.8%)	45 (4.7%)	31 (6.0%)	95 (1.1%)	212 (3.0%)	124 (3.2%)

## Sheet: Table S2
Supplementary Table 2. Characteristics of Participants in the Prevalence of Bipolar Disorders Over Time by Risk Cluster Analysis
Variable	Lower-Risk Cluster			Higher-Risk Cluster			Total
	Year-2	Year-4	Year-6	Year-2	Year-4	Year-6	Year-2	Year-4	Year-6
N	7278	6281	3493	1274	1058	579	8552	7339	4072
Age in years, Mean ± SD	12.08 ± 0.67	14.19 ± 0.71	16.09 ± 0.66	12.03 ± 0.67	14.13 ± 0.71	16.00 ± 0.66	12.07 ± 0.67	14.18 ± 0.71	16.08 ± 0.66
Sex Assigned at Birth
Female, n (%)	3,507 (48.2%)	2,999 (47.7%)	1,671 (47.8%)	512 (40.2%)	416 (39.3%)	229 (39.6%)	4,019 (47.0%)	3,415 (46.5%)	1,900 (46.7%)
Male, n (%)	3,771 (51.8%)	3,282 (52.3%)	1,822 (52.2%)	762 (59.8%)	642 (60.7%)	350 (60.4%)	4,533 (53.0%)	3,924 (53.5%)	2,172 (53.3%)
Timepoint Occurrences
BD-I, n (%)	27 (0.4%)	74 (1.2%)	42 (1.2%)	29 (2.3%)	24 (2.3%)	18 (3.1%)	56 (0.7%)	98 (1.3%)	60 (1.5%)
BD-II, n (%)	8 (0.1%)	33 (0.5%)	20 (0.6%)	15 (1.2%)	5 (0.5%)	2 (0.3%)	23 (0.3%)	38 (0.5%)	22 (0.5%)
BD NOS, n (%)	32 (0.4%)	67 (1.1%)	42 (1.2%)	32 (2.5%)	29 (2.7%)	23 (4.0%)	64 (0.7%)	96 (1.3%)	65 (1.6%)
Any BSD, n (%)	52 (0.7%)	174 (2.8%)	104 (3.0%)	57 (4.5%)	56 (5.3%)	39 (6.7%)	109 (1.3%)	230 (3.1%)	143 (3.5%)

## Sheet: Table S3
Supplementary Table 3. Baseline missingness across the 17 risk variables used for clustering
Baseline Risk Variable	N Missing	Percent Missing
ACE Index Sum Score	1380	0.116279
Bullying Victimization	1	8.42602e-05
CBCL Aggression Problems T	8	0.000674082
CBCL DSM-5 Anxiety T	7	0.000589821
CBCL DSM-5 Attention T	7	0.000589821
CBCL DSM-5 Depression T	7	0.000589821
COI Z-Score	1094	0.0921807
Family History of Depression	519	0.043731
Family History of Mania	527	0.0444051
GBI Mania Sum Score	8	0.000674082
Mean Neighborhood Safety	47	0.00396023
NIHTB Flanker Score	153	0.0128918
NIHTB List Sorting Score	196	0.016515
NIHTB Pattern Comparison Score	171	0.0144085
SDSC Sum Score	33	0.00278059
UPPS-P Negative Urgency Score	24	0.00202224
UPPS-P Positive Urgency Score	23	0.00193798

## Sheet: Table S4
Supplementary Table 4. k-prototypes fit, stability, and anchor-concordance metrics for missForest-imputed baseline data across candidate k solutions
k Value	Smallest Cluster n	lambda	Mean Silhouette	Mean Jaccard	ARI vs Anchor
2	1912	3.27112	0.508502	0.93804	0.870876
3	1516	3.27112	0.227294	0.951354	0.344977
4	1235	3.27112	0.172963	0.904063	0.186673
5	620	3.27112	0.166921	0.706728	0.180159
6	545	3.27112	0.113753	0.676923	0.113921
7	581	3.27112	0.118176	0.626483	0.0945753
8	502	3.27112	0.125206	0.619902	0.0981222

## Sheet: Table S5
Supplementary Table 5. Feature importance summary across misclassification rate (MCR), centroid separability, and XGBoost + SHAP analyses and resulting minimally viable feature subset (MVFS) composition
Variable	MCR Mean	|Δz|	Max Cohens d	Mean |SHAP|	Ranked Importance	Included in Final MVFS?
CBCL DSM-5 Depression T	0.0389348	1.85925	2.49321	2.21752	1	Yes
CBCL Aggression Problems T	0.0366607	1.83298	2.43091	1.92315	2	Yes
CBCL Attention Problems T	0.0359782	1.74414	2.23428	1.96659	3	Yes
CBCL DSM-5 Anxiety T	0.0308751	1.63978	2.02653	1.65485	4	Yes
GBI Mania Sum Score	0.029494	1.65693	2.05917	1.40483	5	Yes
SDSC Sum Score	0.0276449	1.46269	1.71748	1.48862	6	Yes
Family History of Depression	0.0258589	NA	NA	1.44048	7	Yes
Bullying Victimization	0.0225181	NA	NA	1.43596	8	No
ACE Index Sum Score	0.013796	0.779281	0.811527	0.626659	9	No
UPPS-P Negative Urgency Score	0.00861917	0.455594	0.461766	0.490283	10	No
Mean Neighborhood Safety	0.0078991	0.445845	0.451623	0.346631	11	No
UPPS-P Positive Urgency Score	0.00731891	0.409006	0.413449	0.417451	12	No
NIHTB List Sorting Score	0.00711918	0.390001	0.393846	0.483717	13	No
COI Z-Score	0.00692625	0.381587	0.385185	0.407594	14	No
NIHTB Flanker Score	0.00435571	0.278234	0.279612	0.201484	15	No
NIHTB Pattern Comparison Score	0.00361816	0.222814	0.223516	0.0992435	16	No
Family History of Mania	0	NA	NA	0.00738149	17	No

## Sheet: Table S6
Supplementary Table 6. Cross-algorithm clustering benchmark metrics across candidate k solutions
Algorithm	k Value	Mean Gower Silhouette	ARI vs Anchor	BIC	Minimum Cluster n	Maximum Cluster n
clustMD	2	0.338755	0.774863	-371835	1011	8182
clustMD	3	0.169283	0.399304	-366682	905	6245
clustMD	4	0.154432	0.416229	-362918	274	5886
clustMD	5	0.129386	0.286403	-361122	263	5016
clustMD	6	0.11347	0.247254	-359440	266	4731
clustMD	7	0.1098	0.232771	-357816	205	4603
clustMD	8	0.107491	0.160323	-357278	199	3773
kamila	2	0.303359	0.878192	NA	1486	7707
kamila	3	0.127556	0.327297	NA	1111	5144
kamila	4	0.0932973	0.181876	NA	986	3695
kamila	5	0.0693287	0.157082	NA	453	3256
kamila	6	0.0603841	0.124178	NA	380	2776
kamila	7	0.0524202	0.108143	NA	383	2466
kamila	8	0.0349438	0.0979734	NA	308	2215
k-prototypes	2	0.322013	0.993154	NA	1379	7814
k-prototypes	3	0.124697	0.333682	NA	1074	5226
k-prototypes	4	0.145707	0.185963	NA	874	3997
k-prototypes	5	0.14632	0.178708	NA	444	3777
k-prototypes	6	0.0785219	0.108898	NA	412	2520
k-prototypes	7	0.0749263	0.0929981	NA	394	2380
k-prototypes	8	0.0771969	0.092974	NA	338	2146

## Sheet: Table S7
Supplementary Table 7. Relative downstream BSD-related information retained by alternative baseline risk representations in first-onset and occurrence models
Model Type	Outcome	Primary Metric Type	Cluster Model Primary Metric Value	MVFS Model Primary Metric Value	17 Variable Model Primary Metric Value	Secondary Metric Type	Cluster Model Secondary Metric Value	MVFS Model Secondary Metric Value	17 Variable Model Secondary Metric Value	MVFS Model Block Test P-Value	17 Variable Model Block Test P-Value
Onset	BD-I	McFadden pseudo-R2	0.0384593	0.0529611	0.0642867	Brier score	0.00999553	0.00998769	0.00995531	<.001	<.001
Onset	BD-II	McFadden pseudo-R2	0.0389149	0.0420762	0.0537153	Brier score	0.00396293	0.00396234	0.00396078	0.0261695	0.0172602
Onset	BD-NOS	McFadden pseudo-R2	0.0455071	0.0627988	0.0737313	Brier score	0.0102671	0.0102408	0.010203	<.001	<.001
Onset	Any BSD	McFadden pseudo-R2	0.048557	0.0608404	0.0730093	Brier score	0.0214813	0.0214432	0.0213468	<.001	<.001
Prevalence	BD-I	Row-level in-sample AUC	0.696292	0.725829	0.742869	Log loss	0.0567466	0.0559515	0.0551094	<.001	<.001
Prevalence	BD-II	Row-level in-sample AUC	0.726331	0.724828	0.757485	Log loss	0.0257572	0.0256892	0.0252963	0.012065	0.00381023
Prevalence	BD-NOS	Row-level in-sample AUC	0.711716	0.739926	0.757053	Log loss	0.0583737	0.0571435	0.0565017	<.001	<.001
Prevalence	Any BSD	Row-level in-sample AUC	0.713887	0.732348	0.749514	Log loss	0.10696	0.105695	0.104299	<.001	<.001

## Sheet: Table S8
Supplementary Table 8. Cluster-Robust SE Adjusted Odds Ratios for Baseline Risk Representations in Discrete-Time Hazard Models of First-Onset Bipolar Spectrum Outcomes
Outcome	Model	Variable	SE Type	SE	OR [95% CI]	P-Value
BD-I	Cluster Label Model	Risk Cluster	CR2	0.156063	2.992 [2.203, 4.063]	<.001
BD-I	MVFS 7 Variable Model	CBCL DSM-5 Depression T	HC1	0.088883	1.415 [1.189, 1.684]	<.001
BD-I	MVFS 7 Variable Model	CBCL Aggression Problems T	HC1	0.0805383	0.964 [0.823, 1.129]	0.651232
BD-I	MVFS 7 Variable Model	CBCL Attention Problems T	HC1	0.075467	1.109 [0.957, 1.286]	0.17035
BD-I	MVFS 7 Variable Model	CBCL DSM-5 Anxiety T	HC1	0.073602	0.946 [0.819, 1.093]	0.450879
BD-I	MVFS 7 Variable Model	GBI Mania Sum Score	HC1	0.0759382	1.093 [0.942, 1.269]	0.239186
BD-I	MVFS 7 Variable Model	SDSC Sum Score	HC1	0.0655018	1.100 [0.967, 1.250]	0.147443
BD-I	MVFS 7 Variable Model	Family History of Depression	HC1	0.153378	1.111 [0.822, 1.500]	0.494208
BD-I	17 Variable Model	CBCL DSM-5 Depression T	HC1	0.0873421	1.404 [1.183, 1.666]	<.001
BD-I	17 Variable Model	CBCL DSM-5 Anxiety T	HC1	0.0733995	0.955 [0.827, 1.103]	0.532778
BD-I	17 Variable Model	CBCL Attention Problems T	HC1	0.0787118	1.079 [0.925, 1.259]	0.33498
BD-I	17 Variable Model	CBCL Aggression Problems T	HC1	0.0810077	0.925 [0.789, 1.084]	0.33259
BD-I	17 Variable Model	GBI Mania Sum Score	HC1	0.0791377	1.080 [0.925, 1.262]	0.32811
BD-I	17 Variable Model	UPPS-P Negative Urgency Score	HC1	0.0831623	1.149 [0.976, 1.353]	0.0947376
BD-I	17 Variable Model	UPPS-P Positive Urgency Score	HC1	0.0822155	1.067 [0.908, 1.254]	0.428447
BD-I	17 Variable Model	COI Z-Score	HC1	0.0814386	0.932 [0.795, 1.094]	0.388902
BD-I	17 Variable Model	Mean Neighborhood Safety	HC1	0.0724238	1.063 [0.922, 1.225]	0.401523
BD-I	17 Variable Model	SDSC Sum Score	HC1	0.064162	1.094 [0.964, 1.240]	0.162692
BD-I	17 Variable Model	Family History of Depression	HC1	0.171792	0.924 [0.660, 1.294]	0.645417
BD-I	17 Variable Model	Family History of Mania	HC1	0.2657	1.303 [0.774, 2.193]	0.319575
BD-I	17 Variable Model	Bullying Victimization	HC1	0.163619	1.360 [0.987, 1.874]	0.060361
BD-I	17 Variable Model	NIHTB List Sorting Score	HC1	0.0797609	0.926 [0.792, 1.083]	0.336321
BD-I	17 Variable Model	NIHTB Flanker Score	HC1	0.0919794	1.188 [0.992, 1.423]	0.0609324
BD-I	17 Variable Model	NIHTB Pattern Comparison Score	HC1	0.0852336	0.983 [0.832, 1.162]	0.844711
BD-I	17 Variable Model	ACE Index Sum Score	HC1	0.0793963	1.173 [1.004, 1.371]	0.0443637
BD-II	Cluster Label Model	Risk Cluster	CR2	0.263323	2.268 [1.353, 3.803]	0.00191114
BD-II	MVFS 7 Variable Model	CBCL DSM-5 Depression T	HC1	0.164727	1.158 [0.839, 1.600]	0.371784
BD-II	MVFS 7 Variable Model	CBCL Aggression Problems T	HC1	0.148	0.882 [0.660, 1.179]	0.395506
BD-II	MVFS 7 Variable Model	CBCL Attention Problems T	HC1	0.142514	1.066 [0.806, 1.409]	0.65531
BD-II	MVFS 7 Variable Model	CBCL DSM-5 Anxiety T	HC1	0.120411	1.168 [0.923, 1.479]	0.196779
BD-II	MVFS 7 Variable Model	GBI Mania Sum Score	HC1	0.15771	1.003 [0.736, 1.367]	0.983878
BD-II	MVFS 7 Variable Model	SDSC Sum Score	HC1	0.0954964	1.122 [0.931, 1.353]	0.226923
BD-II	MVFS 7 Variable Model	Family History of Depression	HC1	0.244149	0.986 [0.611, 1.591]	0.952851
BD-II	17 Variable Model	CBCL DSM-5 Depression T	HC1	0.169801	1.156 [0.829, 1.613]	0.392702
BD-II	17 Variable Model	CBCL DSM-5 Anxiety T	HC1	0.12299	1.175 [0.923, 1.495]	0.190386
BD-II	17 Variable Model	CBCL Attention Problems T	HC1	0.146565	1.022 [0.767, 1.362]	0.88114
BD-II	17 Variable Model	CBCL Aggression Problems T	HC1	0.147987	0.848 [0.634, 1.133]	0.264601
BD-II	17 Variable Model	GBI Mania Sum Score	HC1	0.157772	1.004 [0.737, 1.369]	0.977311
BD-II	17 Variable Model	UPPS-P Negative Urgency Score	HC1	0.12707	1.134 [0.884, 1.455]	0.321517
BD-II	17 Variable Model	UPPS-P Positive Urgency Score	HC1	0.136496	1.130 [0.865, 1.477]	0.368885
BD-II	17 Variable Model	COI Z-Score	HC1	0.145604	0.977 [0.734, 1.299]	0.872209
BD-II	17 Variable Model	Mean Neighborhood Safety	HC1	0.125697	0.954 [0.745, 1.220]	0.705095
BD-II	17 Variable Model	SDSC Sum Score	HC1	0.097803	1.098 [0.906, 1.330]	0.340474
BD-II	17 Variable Model	Family History of Depression	HC1	0.272694	0.838 [0.491, 1.429]	0.515738
BD-II	17 Variable Model	Family History of Mania	HC1	0.486113	0.983 [0.379, 2.548]	0.971371
BD-II	17 Variable Model	Bullying Victimization	HC1	0.266536	1.060 [0.629, 1.787]	0.826682
BD-II	17 Variable Model	NIHTB List Sorting Score	HC1	0.130432	1.076 [0.833, 1.389]	0.574866
BD-II	17 Variable Model	NIHTB Flanker Score	HC1	0.14112	1.132 [0.859, 1.493]	0.379283
BD-II	17 Variable Model	NIHTB Pattern Comparison Score	HC1	0.123604	0.792 [0.622, 1.010]	0.0597347
BD-II	17 Variable Model	ACE Index Sum Score	HC1	0.118823	1.237 [0.980, 1.561]	0.0738156
BD-NOS	Cluster Label Model	Risk Cluster	CR2	0.150178	3.363 [2.505, 4.515]	<.001
BD-NOS	MVFS 7 Variable Model	CBCL DSM-5 Depression T	HC1	0.0847387	1.178 [0.997, 1.390]	0.053567
BD-NOS	MVFS 7 Variable Model	CBCL Aggression Problems T	HC1	0.0732194	1.152 [0.998, 1.330]	0.0528071
BD-NOS	MVFS 7 Variable Model	CBCL Attention Problems T	HC1	0.0731253	1.106 [0.958, 1.276]	0.168719
BD-NOS	MVFS 7 Variable Model	CBCL DSM-5 Anxiety T	HC1	0.0759761	1.000 [0.861, 1.160]	0.996067
BD-NOS	MVFS 7 Variable Model	GBI Mania Sum Score	HC1	0.0743372	1.074 [0.928, 1.242]	0.338984
BD-NOS	MVFS 7 Variable Model	SDSC Sum Score	HC1	0.0560215	1.195 [1.071, 1.334]	0.00147463
BD-NOS	MVFS 7 Variable Model	Family History of Depression	HC1	0.151962	1.018 [0.756, 1.371]	0.907509
BD-NOS	17 Variable Model	CBCL DSM-5 Depression T	HC1	0.0838937	1.180 [1.001, 1.391]	0.0480331
BD-NOS	17 Variable Model	CBCL DSM-5 Anxiety T	HC1	0.0752546	1.018 [0.878, 1.180]	0.812622
BD-NOS	17 Variable Model	CBCL Attention Problems T	HC1	0.0724366	1.095 [0.950, 1.262]	0.212097
BD-NOS	17 Variable Model	CBCL Aggression Problems T	HC1	0.0736297	1.115 [0.966, 1.289]	0.137835
BD-NOS	17 Variable Model	GBI Mania Sum Score	HC1	0.0734754	1.050 [0.909, 1.212]	0.509006
BD-NOS	17 Variable Model	UPPS-P Negative Urgency Score	HC1	0.0787845	1.199 [1.027, 1.399]	0.0212041
BD-NOS	17 Variable Model	UPPS-P Positive Urgency Score	HC1	0.0867289	1.097 [0.926, 1.301]	0.283862
BD-NOS	17 Variable Model	COI Z-Score	HC1	0.0901186	0.861 [0.722, 1.027]	0.0968082
BD-NOS	17 Variable Model	Mean Neighborhood Safety	HC1	0.0780669	1.020 [0.875, 1.188]	0.803926
BD-NOS	17 Variable Model	SDSC Sum Score	HC1	0.0565876	1.186 [1.062, 1.326]	0.00251874
BD-NOS	17 Variable Model	Family History of Depression	HC1	0.16594	0.933 [0.674, 1.292]	0.678086
BD-NOS	17 Variable Model	Family History of Mania	HC1	0.247674	1.362 [0.838, 2.214]	0.21192
BD-NOS	17 Variable Model	Bullying Victimization	HC1	0.165848	1.071 [0.774, 1.482]	0.679785
BD-NOS	17 Variable Model	NIHTB List Sorting Score	HC1	0.0740991	0.969 [0.838, 1.120]	0.666858
BD-NOS	17 Variable Model	NIHTB Flanker Score	HC1	0.0890571	1.210 [1.016, 1.440]	0.0326005
BD-NOS	17 Variable Model	NIHTB Pattern Comparison Score	HC1	0.0840113	0.984 [0.834, 1.160]	0.843916
BD-NOS	17 Variable Model	ACE Index Sum Score	HC1	0.0842831	1.048 [0.888, 1.236]	0.579237
Any BSD	Cluster Label Model	Risk Cluster	CR2	0.110502	2.743 [2.209, 3.407]	<.001
Any BSD	MVFS 7 Variable Model	CBCL DSM-5 Depression T	HC1	0.0635694	1.275 [1.126, 1.444]	<.001
Any BSD	MVFS 7 Variable Model	CBCL Aggression Problems T	HC1	0.0575974	1.005 [0.898, 1.125]	0.929845
Any BSD	MVFS 7 Variable Model	CBCL Attention Problems T	HC1	0.0545608	1.136 [1.021, 1.264]	0.0196793
Any BSD	MVFS 7 Variable Model	CBCL DSM-5 Anxiety T	HC1	0.0563017	0.977 [0.875, 1.091]	0.675029
Any BSD	MVFS 7 Variable Model	GBI Mania Sum Score	HC1	0.0574887	1.051 [0.939, 1.176]	0.391375
Any BSD	MVFS 7 Variable Model	SDSC Sum Score	HC1	0.045355	1.146 [1.048, 1.252]	0.00269986
Any BSD	MVFS 7 Variable Model	Family History of Depression	HC1	0.105592	1.068 [0.868, 1.313]	0.534418
Any BSD	17 Variable Model	CBCL DSM-5 Depression T	HC1	0.0634897	1.280 [1.130, 1.449]	<.001
Any BSD	17 Variable Model	CBCL DSM-5 Anxiety T	HC1	0.0562044	0.988 [0.885, 1.103]	0.834225
Any BSD	17 Variable Model	CBCL Attention Problems T	HC1	0.0553911	1.107 [0.993, 1.234]	0.0657308
Any BSD	17 Variable Model	CBCL Aggression Problems T	HC1	0.0575675	0.974 [0.870, 1.090]	0.646451
Any BSD	17 Variable Model	GBI Mania Sum Score	HC1	0.0579536	1.034 [0.923, 1.158]	0.567142
Any BSD	17 Variable Model	UPPS-P Negative Urgency Score	HC1	0.0556682	1.142 [1.024, 1.273]	0.0174325
Any BSD	17 Variable Model	UPPS-P Positive Urgency Score	HC1	0.0574406	1.123 [1.003, 1.257]	0.0437679
Any BSD	17 Variable Model	COI Z-Score	HC1	0.0604115	0.902 [0.801, 1.015]	0.0861976
Any BSD	17 Variable Model	Mean Neighborhood Safety	HC1	0.0533186	1.041 [0.937, 1.155]	0.45424
Any BSD	17 Variable Model	SDSC Sum Score	HC1	0.0450737	1.134 [1.038, 1.239]	0.00518379
Any BSD	17 Variable Model	Family History of Depression	HC1	0.117672	0.949 [0.753, 1.195]	0.654271
Any BSD	17 Variable Model	Family History of Mania	HC1	0.187604	1.288 [0.892, 1.860]	0.177716
Any BSD	17 Variable Model	Bullying Victimization	HC1	0.115929	1.160 [0.924, 1.456]	0.199741
Any BSD	17 Variable Model	NIHTB List Sorting Score	HC1	0.054481	0.961 [0.863, 1.069]	0.460867
Any BSD	17 Variable Model	NIHTB Flanker Score	HC1	0.0620746	1.243 [1.101, 1.404]	<.001
Any BSD	17 Variable Model	NIHTB Pattern Comparison Score	HC1	0.0569614	0.909 [0.813, 1.017]	0.0958188
Any BSD	17 Variable Model	ACE Index Sum Score	HC1	0.0561397	1.107 [0.991, 1.235]	0.0710914

## Sheet: Table S9
Supplementary Table 9. Odds Ratios for Baseline Risk Representations in Generalized Estimating Equation Models of Bipolar Spectrum Outcome Occurrence
Outcome	Model	Variable	SE	OR [95% CI]	P-Value
BD-I	Cluster Label Model	Risk Cluster	0.151381	3.070 [2.282, 4.130]	<.001
BD-I	MVFS 7 Variable Model	CBCL DSM-5 Depression T	0.0890076	1.333 [1.119, 1.587]	0.00125778
BD-I	MVFS 7 Variable Model	CBCL Aggression Problems T	0.0819693	0.959 [0.817, 1.126]	0.609862
BD-I	MVFS 7 Variable Model	CBCL Attention Problems T	0.0718871	1.063 [0.923, 1.223]	0.398686
BD-I	MVFS 7 Variable Model	CBCL DSM-5 Anxiety T	0.0746254	1.015 [0.877, 1.174]	0.846096
BD-I	MVFS 7 Variable Model	GBI Mania Sum Score	0.0752598	1.103 [0.952, 1.279]	0.191358
BD-I	MVFS 7 Variable Model	SDSC Sum Score	0.0622275	1.110 [0.983, 1.254]	0.0931342
BD-I	MVFS 7 Variable Model	Family History of Depression	0.146648	1.196 [0.897, 1.594]	0.22293
BD-I	17 Variable Model	CBCL DSM-5 Depression T	0.086545	1.326 [1.119, 1.571]	0.00110494
BD-I	17 Variable Model	CBCL DSM-5 Anxiety T	0.0716769	1.020 [0.887, 1.174]	0.779692
BD-I	17 Variable Model	CBCL Attention Problems T	0.0718412	1.045 [0.908, 1.203]	0.541047
BD-I	17 Variable Model	CBCL Aggression Problems T	0.0804196	0.920 [0.786, 1.077]	0.29994
BD-I	17 Variable Model	GBI Mania Sum Score	0.0748474	1.081 [0.933, 1.252]	0.298765
BD-I	17 Variable Model	UPPS-P Negative Urgency Score	0.0779976	1.115 [0.957, 1.299]	0.163146
BD-I	17 Variable Model	UPPS-P Positive Urgency Score	0.078437	1.111 [0.953, 1.296]	0.179014
BD-I	17 Variable Model	COI Z-Score	0.0807583	0.947 [0.809, 1.110]	0.503127
BD-I	17 Variable Model	Mean Neighborhood Safety	0.0709427	1.090 [0.948, 1.253]	0.224741
BD-I	17 Variable Model	SDSC Sum Score	0.0598208	1.106 [0.984, 1.244]	0.0913844
BD-I	17 Variable Model	Family History of Depression	0.162448	0.950 [0.691, 1.306]	0.750248
BD-I	17 Variable Model	Family History of Mania	0.258025	1.200 [0.724, 1.990]	0.479712
BD-I	17 Variable Model	Bullying Victimization	0.157925	1.351 [0.991, 1.841]	0.0566574
BD-I	17 Variable Model	NIHTB List Sorting Score	0.075296	0.903 [0.779, 1.047]	0.176643
BD-I	17 Variable Model	NIHTB Flanker Score	0.0903299	1.224 [1.026, 1.461]	0.0250474
BD-I	17 Variable Model	NIHTB Pattern Comparison Score	0.0796803	0.987 [0.845, 1.154]	0.873397
BD-I	17 Variable Model	ACE Index Sum Score	0.075868	1.225 [1.056, 1.422]	0.00740228
BD-II	Cluster Label Model	Risk Cluster	0.246229	2.340 [1.444, 3.792]	0.000553646
BD-II	MVFS 7 Variable Model	CBCL DSM-5 Depression T	0.156112	1.190 [0.876, 1.616]	0.264605
BD-II	MVFS 7 Variable Model	CBCL Aggression Problems T	0.135571	0.909 [0.697, 1.186]	0.483837
BD-II	MVFS 7 Variable Model	CBCL Attention Problems T	0.145295	0.955 [0.718, 1.270]	0.751914
BD-II	MVFS 7 Variable Model	CBCL DSM-5 Anxiety T	0.125147	1.110 [0.868, 1.418]	0.40496
BD-II	MVFS 7 Variable Model	GBI Mania Sum Score	0.135016	1.023 [0.785, 1.333]	0.863823
BD-II	MVFS 7 Variable Model	SDSC Sum Score	0.0900612	1.180 [0.989, 1.407]	0.0667299
BD-II	MVFS 7 Variable Model	Family History of Depression	0.234474	1.031 [0.651, 1.633]	0.896256
BD-II	17 Variable Model	CBCL DSM-5 Depression T	0.15793	1.187 [0.871, 1.617]	0.278013
BD-II	17 Variable Model	CBCL DSM-5 Anxiety T	0.12373	1.123 [0.881, 1.432]	0.347528
BD-II	17 Variable Model	CBCL Attention Problems T	0.144313	0.921 [0.694, 1.222]	0.567205
BD-II	17 Variable Model	CBCL Aggression Problems T	0.133614	0.872 [0.671, 1.133]	0.304637
BD-II	17 Variable Model	GBI Mania Sum Score	0.130093	1.001 [0.776, 1.292]	0.994306
BD-II	17 Variable Model	UPPS-P Negative Urgency Score	0.121628	1.115 [0.878, 1.415]	0.371705
BD-II	17 Variable Model	UPPS-P Positive Urgency Score	0.129798	1.109 [0.860, 1.430]	0.425633
BD-II	17 Variable Model	COI Z-Score	0.140528	0.931 [0.707, 1.226]	0.608798
BD-II	17 Variable Model	Mean Neighborhood Safety	0.123525	0.989 [0.776, 1.259]	0.925669
BD-II	17 Variable Model	SDSC Sum Score	0.0907952	1.154 [0.966, 1.379]	0.113716
BD-II	17 Variable Model	Family History of Depression	0.269976	0.829 [0.488, 1.406]	0.486067
BD-II	17 Variable Model	Family History of Mania	0.446584	1.003 [0.418, 2.407]	0.99478
BD-II	17 Variable Model	Bullying Victimization	0.25038	1.119 [0.685, 1.828]	0.653907
BD-II	17 Variable Model	NIHTB List Sorting Score	0.124386	1.045 [0.819, 1.334]	0.721543
BD-II	17 Variable Model	NIHTB Flanker Score	0.134933	1.162 [0.892, 1.514]	0.264783
BD-II	17 Variable Model	NIHTB Pattern Comparison Score	0.113889	0.761 [0.609, 0.951]	0.0164805
BD-II	17 Variable Model	ACE Index Sum Score	0.120227	1.294 [1.022, 1.638]	0.0320128
BD-NOS	Cluster Label Model	Risk Cluster	0.144112	3.669 [2.766, 4.866]	<.001
BD-NOS	MVFS 7 Variable Model	CBCL DSM-5 Depression T	0.0846174	1.098 [0.930, 1.296]	0.267777
BD-NOS	MVFS 7 Variable Model	CBCL Aggression Problems T	0.0700065	1.141 [0.994, 1.308]	0.0602611
BD-NOS	MVFS 7 Variable Model	CBCL Attention Problems T	0.0680064	1.138 [0.996, 1.301]	0.0566774
BD-NOS	MVFS 7 Variable Model	CBCL DSM-5 Anxiety T	0.0693464	1.039 [0.907, 1.190]	0.583642
BD-NOS	MVFS 7 Variable Model	GBI Mania Sum Score	0.0674269	1.091 [0.956, 1.245]	0.198215
BD-NOS	MVFS 7 Variable Model	SDSC Sum Score	0.0537054	1.182 [1.064, 1.313]	0.00183359
BD-NOS	MVFS 7 Variable Model	Family History of Depression	0.144151	1.118 [0.843, 1.483]	0.440286
BD-NOS	17 Variable Model	CBCL DSM-5 Depression T	0.0836384	1.109 [0.941, 1.307]	0.215825
BD-NOS	17 Variable Model	CBCL DSM-5 Anxiety T	0.0685472	1.049 [0.917, 1.200]	0.483095
BD-NOS	17 Variable Model	CBCL Attention Problems T	0.0657186	1.126 [0.990, 1.281]	0.0709053
BD-NOS	17 Variable Model	CBCL Aggression Problems T	0.0708381	1.100 [0.957, 1.264]	0.178127
BD-NOS	17 Variable Model	GBI Mania Sum Score	0.0683307	1.060 [0.927, 1.212]	0.392385
BD-NOS	17 Variable Model	UPPS-P Negative Urgency Score	0.0815768	1.163 [0.991, 1.365]	0.0639141
BD-NOS	17 Variable Model	UPPS-P Positive Urgency Score	0.0870464	1.100 [0.928, 1.305]	0.272714
BD-NOS	17 Variable Model	COI Z-Score	0.0873246	0.892 [0.752, 1.059]	0.191456
BD-NOS	17 Variable Model	Mean Neighborhood Safety	0.0755939	1.008 [0.869, 1.169]	0.919313
BD-NOS	17 Variable Model	SDSC Sum Score	0.0531073	1.174 [1.058, 1.303]	0.00247172
BD-NOS	17 Variable Model	Family History of Depression	0.159013	0.989 [0.724, 1.350]	0.942067
BD-NOS	17 Variable Model	Family History of Mania	0.246964	1.236 [0.762, 2.006]	0.390037
BD-NOS	17 Variable Model	Bullying Victimization	0.156651	1.181 [0.869, 1.606]	0.287394
BD-NOS	17 Variable Model	NIHTB List Sorting Score	0.0714664	0.916 [0.796, 1.054]	0.219686
BD-NOS	17 Variable Model	NIHTB Flanker Score	0.0871482	1.176 [0.991, 1.395]	0.063251
BD-NOS	17 Variable Model	NIHTB Pattern Comparison Score	0.0800039	0.976 [0.834, 1.141]	0.757613
BD-NOS	17 Variable Model	ACE Index Sum Score	0.0826402	1.082 [0.920, 1.272]	0.339201
Any BSD	Cluster Label Model	Risk Cluster	0.10729	2.854 [2.313, 3.522]	<.001
Any BSD	MVFS 7 Variable Model	CBCL DSM-5 Depression T	0.0622105	1.217 [1.077, 1.375]	0.00158492
Any BSD	MVFS 7 Variable Model	CBCL Aggression Problems T	0.0547639	1.020 [0.916, 1.135]	0.722452
Any BSD	MVFS 7 Variable Model	CBCL Attention Problems T	0.0521354	1.090 [0.984, 1.207]	0.0996446
Any BSD	MVFS 7 Variable Model	CBCL DSM-5 Anxiety T	0.0531098	1.023 [0.922, 1.136]	0.662979
Any BSD	MVFS 7 Variable Model	GBI Mania Sum Score	0.0541092	1.071 [0.963, 1.191]	0.203665
Any BSD	MVFS 7 Variable Model	SDSC Sum Score	0.045134	1.137 [1.041, 1.242]	0.00438107
Any BSD	MVFS 7 Variable Model	Family History of Depression	0.102929	1.112 [0.908, 1.360]	0.30431
Any BSD	17 Variable Model	CBCL DSM-5 Depression T	0.0611886	1.221 [1.083, 1.376]	0.00111487
Any BSD	17 Variable Model	CBCL DSM-5 Anxiety T	0.0523428	1.033 [0.932, 1.144]	0.538871
Any BSD	17 Variable Model	CBCL Attention Problems T	0.0514294	1.071 [0.968, 1.185]	0.181464
Any BSD	17 Variable Model	CBCL Aggression Problems T	0.0545577	0.988 [0.888, 1.099]	0.820917
Any BSD	17 Variable Model	GBI Mania Sum Score	0.0541557	1.047 [0.942, 1.165]	0.392823
Any BSD	17 Variable Model	UPPS-P Negative Urgency Score	0.0573777	1.110 [0.992, 1.242]	0.0686345
Any BSD	17 Variable Model	UPPS-P Positive Urgency Score	0.0573569	1.111 [0.993, 1.243]	0.0669831
Any BSD	17 Variable Model	COI Z-Score	0.0592107	0.904 [0.805, 1.015]	0.0880879
Any BSD	17 Variable Model	Mean Neighborhood Safety	0.0516705	1.052 [0.950, 1.164]	0.329597
Any BSD	17 Variable Model	SDSC Sum Score	0.0438983	1.126 [1.033, 1.227]	0.00676741
Any BSD	17 Variable Model	Family History of Depression	0.115135	0.947 [0.756, 1.187]	0.639404
Any BSD	17 Variable Model	Family History of Mania	0.183959	1.248 [0.870, 1.790]	0.227937
Any BSD	17 Variable Model	Bullying Victimization	0.111901	1.236 [0.992, 1.539]	0.0584796
Any BSD	17 Variable Model	NIHTB List Sorting Score	0.0532429	0.948 [0.854, 1.052]	0.311454
Any BSD	17 Variable Model	NIHTB Flanker Score	0.0622918	1.230 [1.089, 1.390]	0.00087589
Any BSD	17 Variable Model	NIHTB Pattern Comparison Score	0.0549889	0.916 [0.823, 1.021]	0.112046
Any BSD	17 Variable Model	ACE Index Sum Score	0.0561661	1.141 [1.022, 1.274]	0.0186656
